# Supplementary material for: Reciprocal c-di-GMP signaling: Incomplete flagellum biogenesis triggers c-di-GMP signaling pathways that promote biofilm formation
Source: PubMed Central journal article supplement (PMC7098655; doi:10.1371/journal.pgen.1008703), 2020-03-16
Supplement: pgen.1008703.s010.pdf [file pgen.1008703.s010.pdf]

## **Text S1. Extended Methods**

**Analysis of protein localization. Analysis of protein localization.** Overnight cultures of strains containing the chromosomally tagged sfGFP were diluted 1:50 in DASW (Defined Artificial Sea Water; 234 mM NaCl, 27.5 mM MgSO<sub>4</sub>, 1.5 mM NaHCO<sub>3</sub>, 4.95 mM CaCl<sub>2</sub>, 5.15 mM KCl, 0.07 mM Na<sub>2</sub>B<sub>4</sub>O<sub>7</sub>, 0.05 mM SrCl, 0.015 mM NaBr, 0.001 mM NaI, 0.013 mM LiCl, 18.7 mM NH<sub>4</sub>Cl, 0.187 mM K<sub>2</sub>HPO<sub>4</sub>, 50 mM HEPES, pH 7.4) and 4 µL of the diluted culture were pipetted on 40 µL agarose pads (1% agarose in DASW) on glass slides. Cover slips were placed over the agarose pad and sealed utilizing Valap (1:1:1 [w/w/w] mixture of Lanoline, Paraffin, and Vaseline). The bacterial cells were imaged utilizing the Zeiss Zen Blue.
